# Supplementary material
Source: Springer Nature journal article supplement (https://www.springermedizin.de/resource/supplementary/13058_2011_2917_MOESM4_ESM.pdf/9702892)
Supplement: MOESM4 [file 9702892]

**CTC**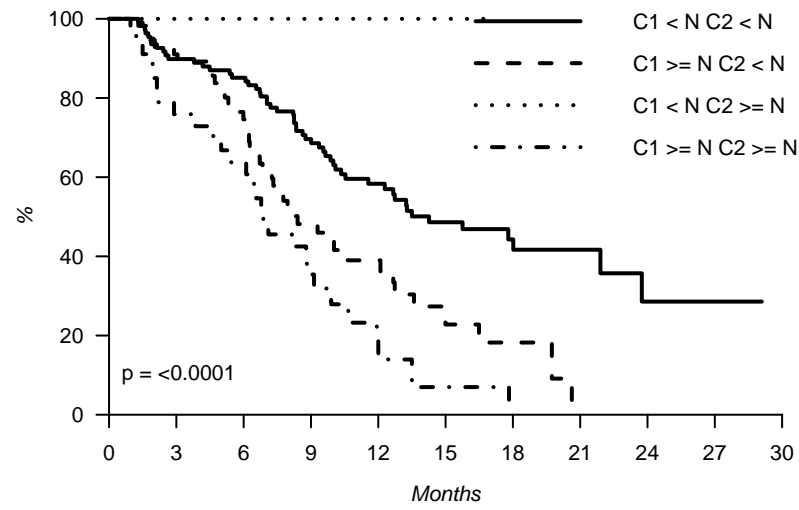**Number at risk**

|     |     |    |    |    |    |    |    |   |   |   |   |
|-----|-----|----|----|----|----|----|----|---|---|---|---|
| —   | 109 | 96 | 90 | 67 | 44 | 31 | 17 | 7 | 4 | 3 | 0 |
| - - | 56  | 50 | 40 | 23 | 14 | 5  | 3  | 0 | 0 | 0 | 0 |
| ... | 2   | 2  | 2  | 2  | 2  | 1  | 0  | 0 | 0 | 0 | 0 |
| - . | 34  | 25 | 21 | 10 | 4  | 1  | 0  | 0 | 0 | 0 | 0 |

**CEA**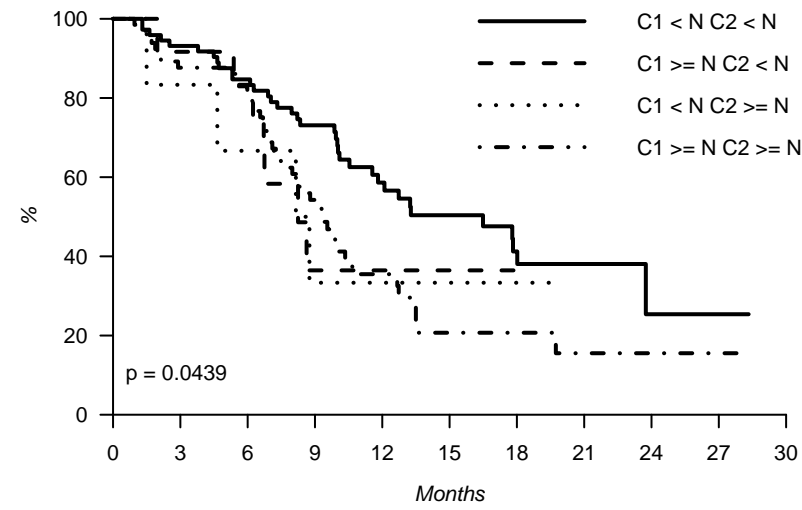**Number at risk**

|     |    |    |    |    |    |    |    |   |   |   |   |
|-----|----|----|----|----|----|----|----|---|---|---|---|
| —   | 73 | 67 | 59 | 47 | 29 | 22 | 13 | 6 | 2 | 1 | 0 |
| - - | 12 | 11 | 10 | 3  | 3  | 2  | 1  | 0 | 0 | 0 | 0 |
| ... | 6  | 5  | 4  | 2  | 1  | 1  | 1  | 0 | 0 | 0 | 0 |
| - . | 66 | 56 | 52 | 30 | 14 | 6  | 4  | 3 | 3 | 2 | 0 |

**LDH**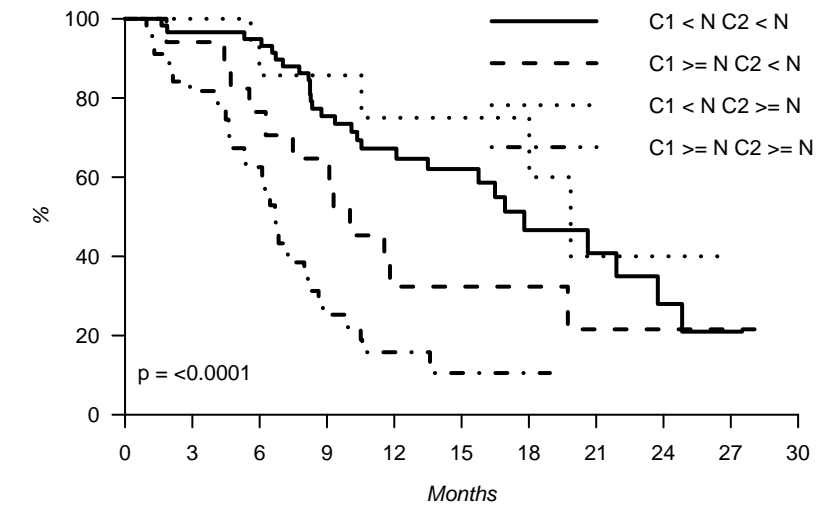**Number at risk**

|     |    |    |    |    |    |    |    |   |   |   |   |
|-----|----|----|----|----|----|----|----|---|---|---|---|
| —   | 59 | 57 | 55 | 40 | 26 | 20 | 10 | 7 | 4 | 1 | 0 |
| - - | 17 | 16 | 13 | 10 | 5  | 4  | 3  | 2 | 2 | 1 | 0 |
| ... | 15 | 14 | 12 | 12 | 7  | 5  | 5  | 2 | 1 | 0 | 0 |
| - . | 45 | 34 | 26 | 8  | 5  | 2  | 1  | 0 | 0 | 0 | 0 |

**CA15-3**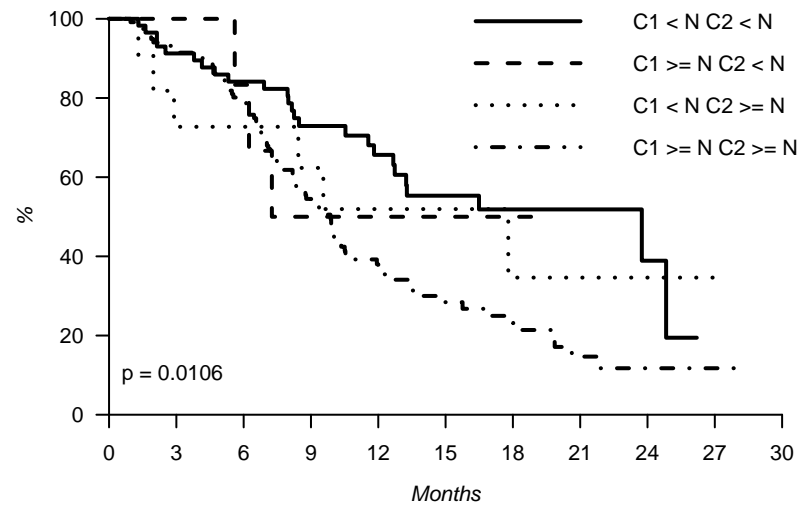**Number at risk**

|     |     |     |    |    |    |    |    |   |   |   |   |
|-----|-----|-----|----|----|----|----|----|---|---|---|---|
| —   | 58  | 52  | 46 | 37 | 26 | 20 | 11 | 6 | 3 | 0 | 0 |
| - - | 6   | 6   | 5  | 2  | 2  | 2  | 1  | 0 | 0 | 0 | 0 |
| ... | 11  | 8   | 8  | 6  | 4  | 3  | 2  | 2 | 1 | 1 | 0 |
| - . | 118 | 107 | 91 | 56 | 31 | 18 | 13 | 5 | 4 | 2 | 0 |

**CYFRA21-1**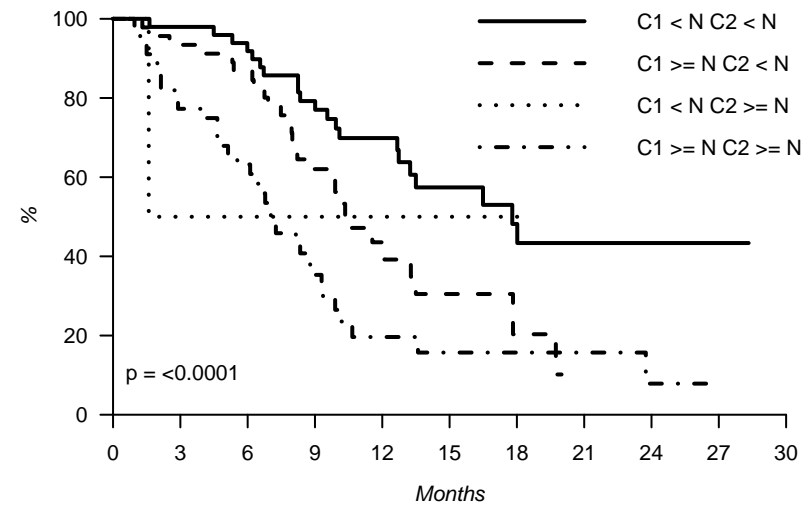**Number at risk**

|     |    |    |    |    |    |    |    |   |   |   |   |
|-----|----|----|----|----|----|----|----|---|---|---|---|
| —   | 49 | 48 | 45 | 36 | 24 | 16 | 10 | 4 | 2 | 2 | 0 |
| - - | 46 | 42 | 39 | 24 | 11 | 6  | 2  | 0 | 0 | 0 | 0 |
| ... | 2  | 1  | 1  | 1  | 1  | 1  | 1  | 0 | 0 | 0 | 0 |
| - . | 45 | 33 | 26 | 13 | 5  | 4  | 2  | 2 | 1 | 0 | 0 |

**ALP**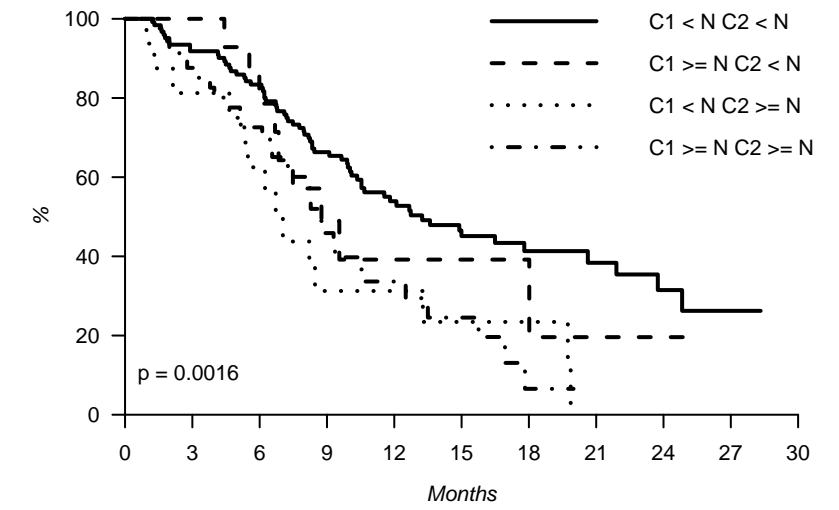**Number at risk**

|     |     |     |    |    |    |    |    |    |   |   |   |
|-----|-----|-----|----|----|----|----|----|----|---|---|---|
| —   | 124 | 111 | 99 | 71 | 46 | 32 | 20 | 13 | 8 | 3 | 0 |
| - - | 14  | 14  | 11 | 6  | 3  | 3  | 2  | 1  | 1 | 0 | 0 |
| ... | 16  | 13  | 10 | 5  | 4  | 2  | 2  | 0  | 0 | 0 | 0 |
| - . | 41  | 35  | 29 | 15 | 10 | 5  | 1  | 0  | 0 | 0 | 0 |
